# Supplementary material for: Geophysical Surveys for Geotechnical Model Reconstruction and Slope Stability Modelling
Source: MDPI journal article supplement (doi:10.3390/rs15082159), 2023-04-19
Supplement: s1 [file s1]

**Supplementary Materials:** The following supporting information can be downloaded at: <https://www.mdpi.com/article/10.3390/rs15082159/s1>.

[//www.mdpi.com/article/10.3390/rs15082159/s1](https://www.mdpi.com/article/10.3390/rs15082159/s1).

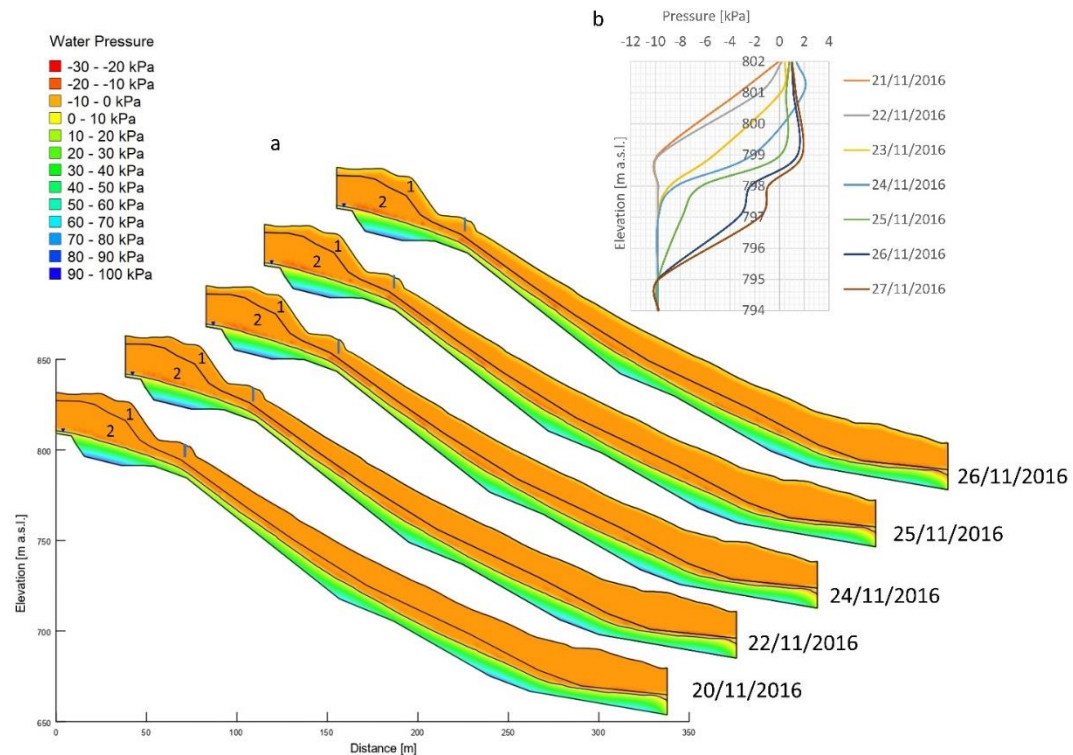

**Figure S14.** a) Distribution of interstitial pressures in the slope (section A-A') during selected time phases for the November 2016 event. The blue line in image represents the vertical transect for which changes in interstitial pressures were analysed. b) Level 1 pressure profiles along the highlighted profile (blue line) in Figure 13a. 1 Layer 1; 2 Layer 2.

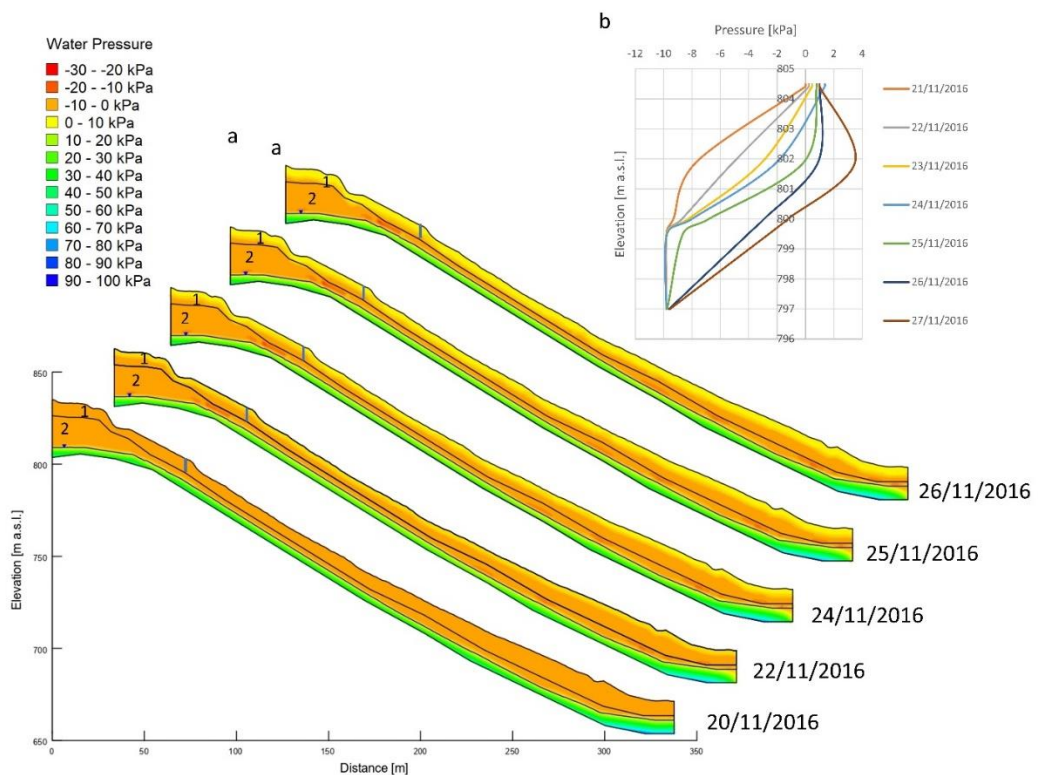

**Figure S15.** a) Distribution of interstitial pressures in the slope (section B-B') during selected time steps for the November 2016 event. The blue line in the image represents the vertical transect for which changes in interstitial pressures were analysed. b) Pressure profiles for Level 1 along the highlighted profile (blue line) in Figure 14a. 1 Layer 1; 2 Layer 2.

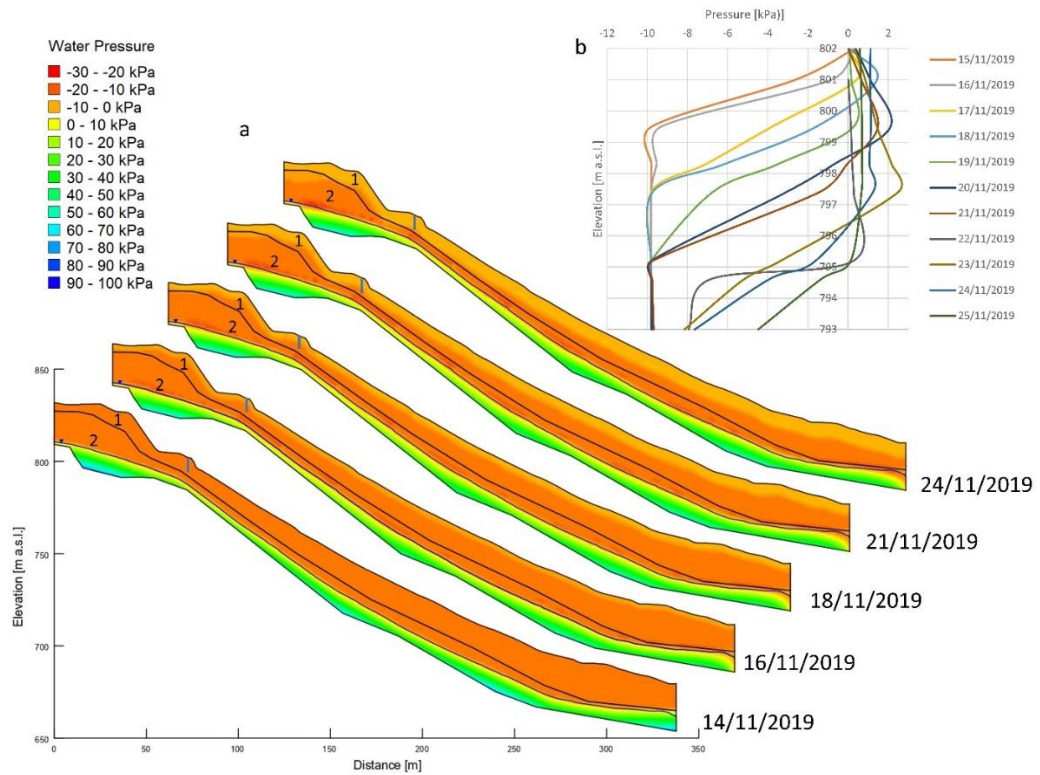

**Figure S16.** Distribution of interstitial pressures in the slope (section A-A') during selected storm phases for the November 2019 event. The blue line in the image represents the vertical transect for which changes in interstitial pressures were analysed. b) Layer 1 pressure profiles along the highlighted profile (blue line) in Error! Reference source not found.a. 1 Layer 1; 2 Layer 2.

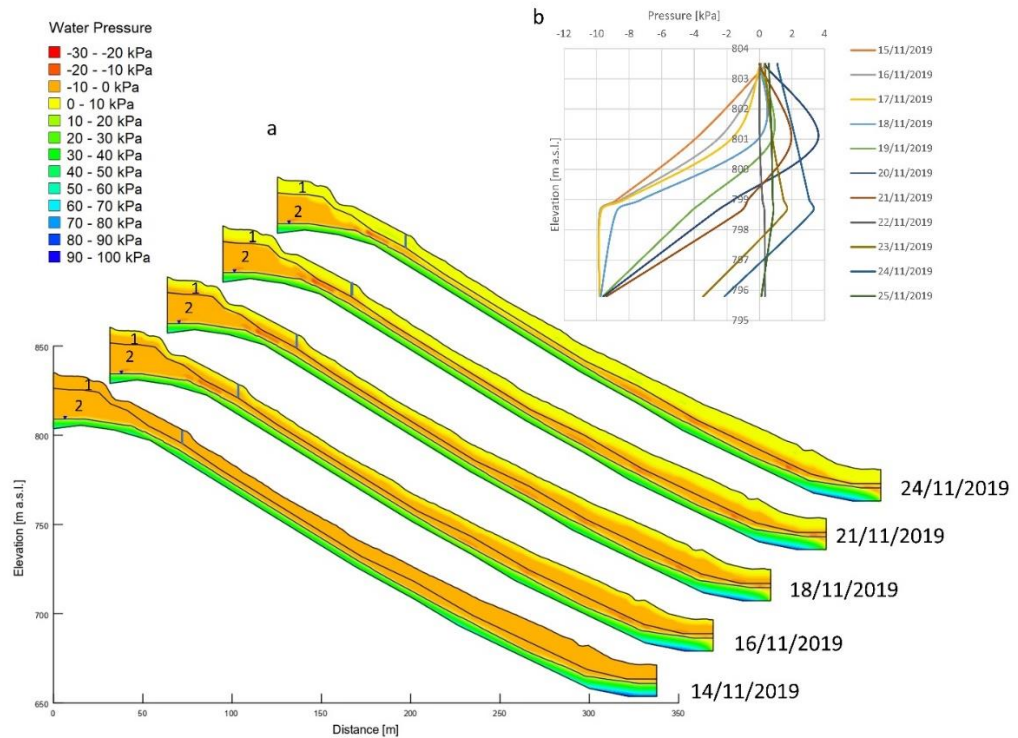

**Figure S17.** a) Distribution of interstitial pressures in the slope (section B-B') during selected time steps for the November 2019 event. The blue line in the image represents the vertical transect for which changes in interstitial pressures were analysed. b) Pressure profiles for Level 1 along the highlighted profile (blue line) in Figure 16a. 1 Layer 1; 2 Layer 2.

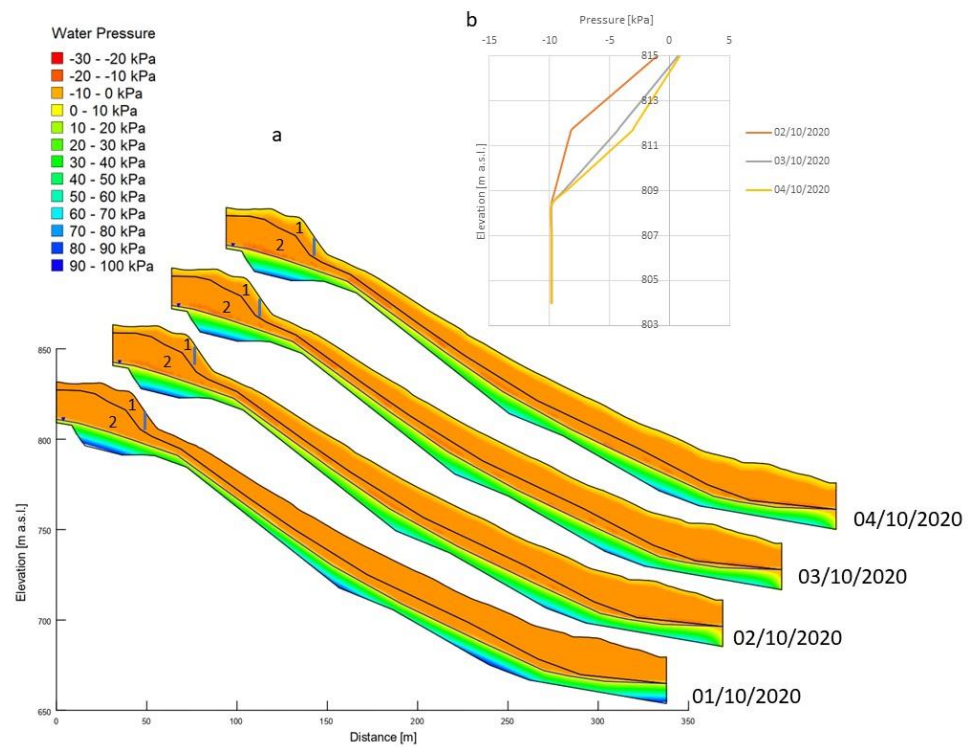

**Figure S18.** a) Distribution of interstitial pressures in the slope (section A-A') during selected storm phases for the October 2020 event. The blue line in the image represents the vertical transect for which changes in interstitial pressures were analysed. b) Pressure profiles for Level 1 along the highlighted profile (blue line) in Figure 17a. 1 Layer 1; 2 Layer 2.

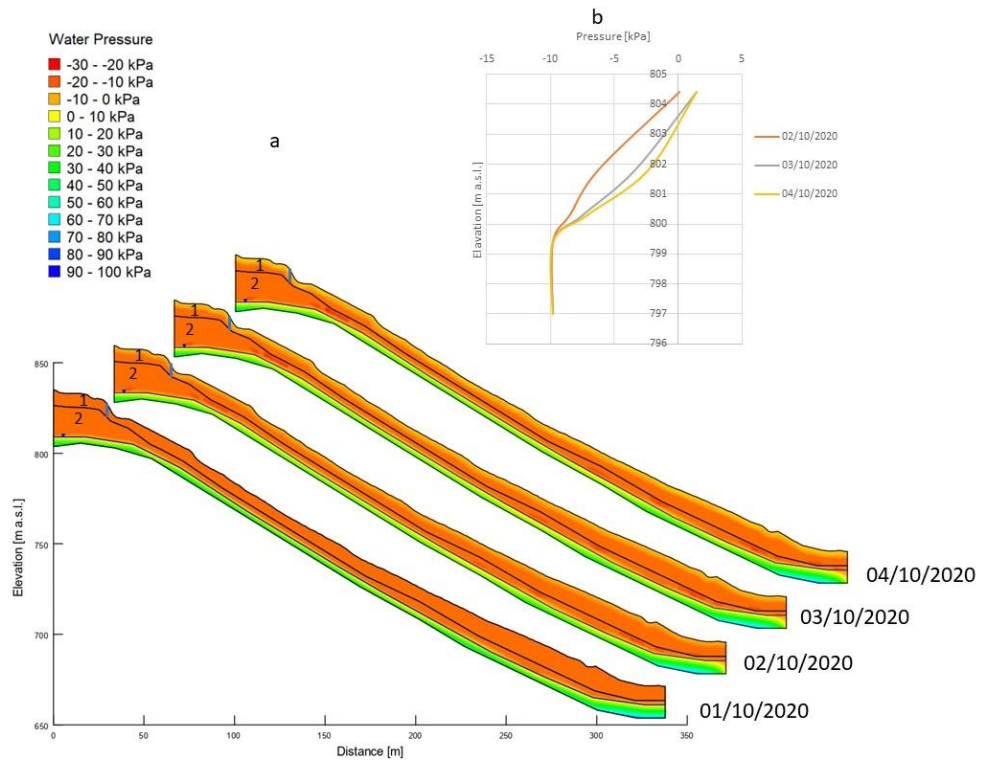

**Figure S19.** a) Distribution of interstitial pressures in the slope (section B-B') during selected time steps for the October event. The blue line in the image represents the vertical transect for which changes in interstitial pressures were analysed. b) Pressure profiles for Level 1 along the highlighted profile (blue line) in 18a. 1 Layer 1; 2 Layer 2.
